# Supplementary material for: Crystal and local structure refinement in Ca2Al3O6F explored by X-ray diffraction and Raman spectroscopy
Source: Royal Society of Chemistry journal article supplement (doi:10.1039/c3cp53816h), 2013-11-05
Supplement: c3cp53816h.pdf [file c3cp53816h.pdf]

# Supporting Information

## Crystal and Local Structure Refinement in $\text{Ca}_2\text{Al}_3\text{O}_6\text{F}$ Explored by X-ray

### Diffraction and Raman Spectroscopy

Zhiguo Xia<sup>a,\*</sup>, Maxim S. Molokeev<sup>b</sup>, Aleksandr S. Oreshonkov<sup>c</sup>, Victor V. Atuchin<sup>d\*</sup>, Ru-Shi Liu<sup>e</sup>, Cheng Dong<sup>f</sup>

**Table S1.** Parameters of the interatomic interaction potential

| Interaction | $\lambda$ , aJ/Å <sup>2</sup> | $\rho$ , Å |
|-------------|-------------------------------|------------|
| Ca – O      | 240.17                        | 0.3834     |
| Ca – F      | 248.00                        | 0.3834     |
| Al – O      | 215.17                        | 0.3734     |
| Al – F      | 220.17                        | 0.3800     |
| F – F       | 230.17                        | 0.3834     |
| O – O       | 400.17                        | 0.4000     |
| O – F       | 250.17                        | 0.3834     |

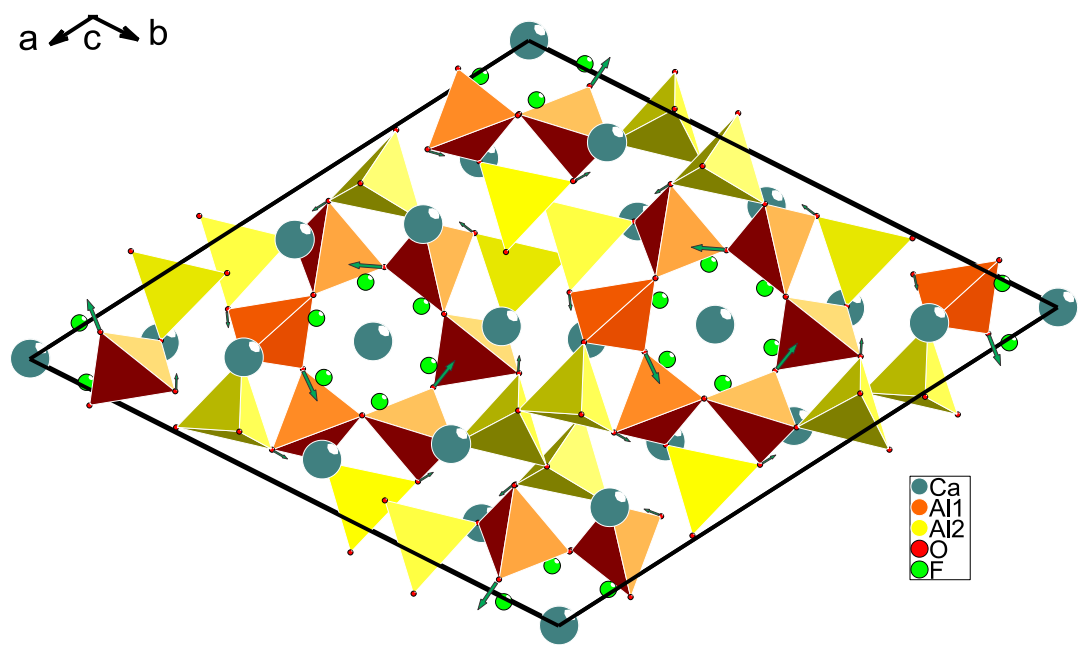

Fig. S1.  $A_g$  (797  $\text{cm}^{-1}$ ) vibrational mode of  $\text{AlO}_4$  tetrahedrons.

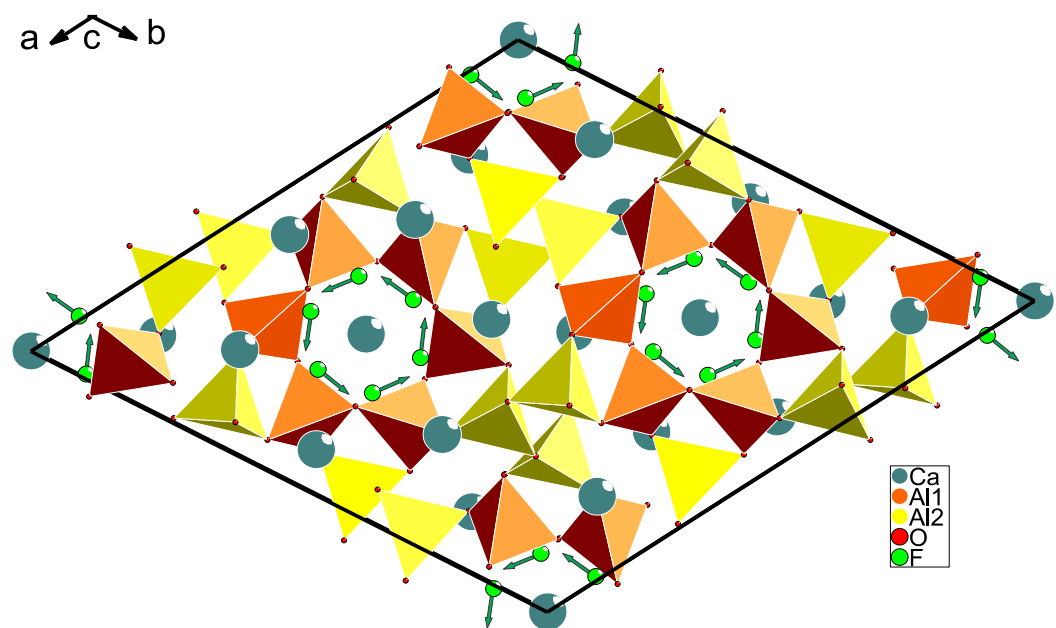

Fig. S2.  $A_g$  (252  $\text{cm}^{-1}$ ) vibrations mode of fluorine in  $\text{Ca}_2\text{O}_3\text{F}_4$  polyhedrons.
